# Supplementary material for: Demonstrating the use of UNSEEN climate data for hydrological applications: case studies for extreme floods and droughts in England
Source: Copernicus journal article supplement (doi:10.5194/nhess-24-2953-2024), 2024-09-04
Supplement: Supplementary file 1 [file nhess-24-2953-2024-supplement.pdf]

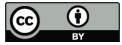

*Supplement of*

## **Demonstrating the use of UNSEEN climate data for hydrological applications: case studies for extreme floods and droughts in England**

**Alison L. Kay et al.**

*Correspondence to:* Alison L. Kay (alkay@ceh.ac.uk)

The copyright of individual parts of the supplement might differ from the article licence.

## Supplementary Material

Maps of the monthly precipitation bias-correction factors are shown in Figure S1 for the May-initialised UNSEEN GCM ensemble and Figure S2 for the Nov-initialised UNSEEN ensemble. The factors are often less than 1 in the south/east (indicating that GCM precipitation is too high) and greater than 1 in the north/west (indicating that GCM precipitation is too low). In late summer/early autumn the factors are greater than 1 for almost all of the GCM grid boxes.

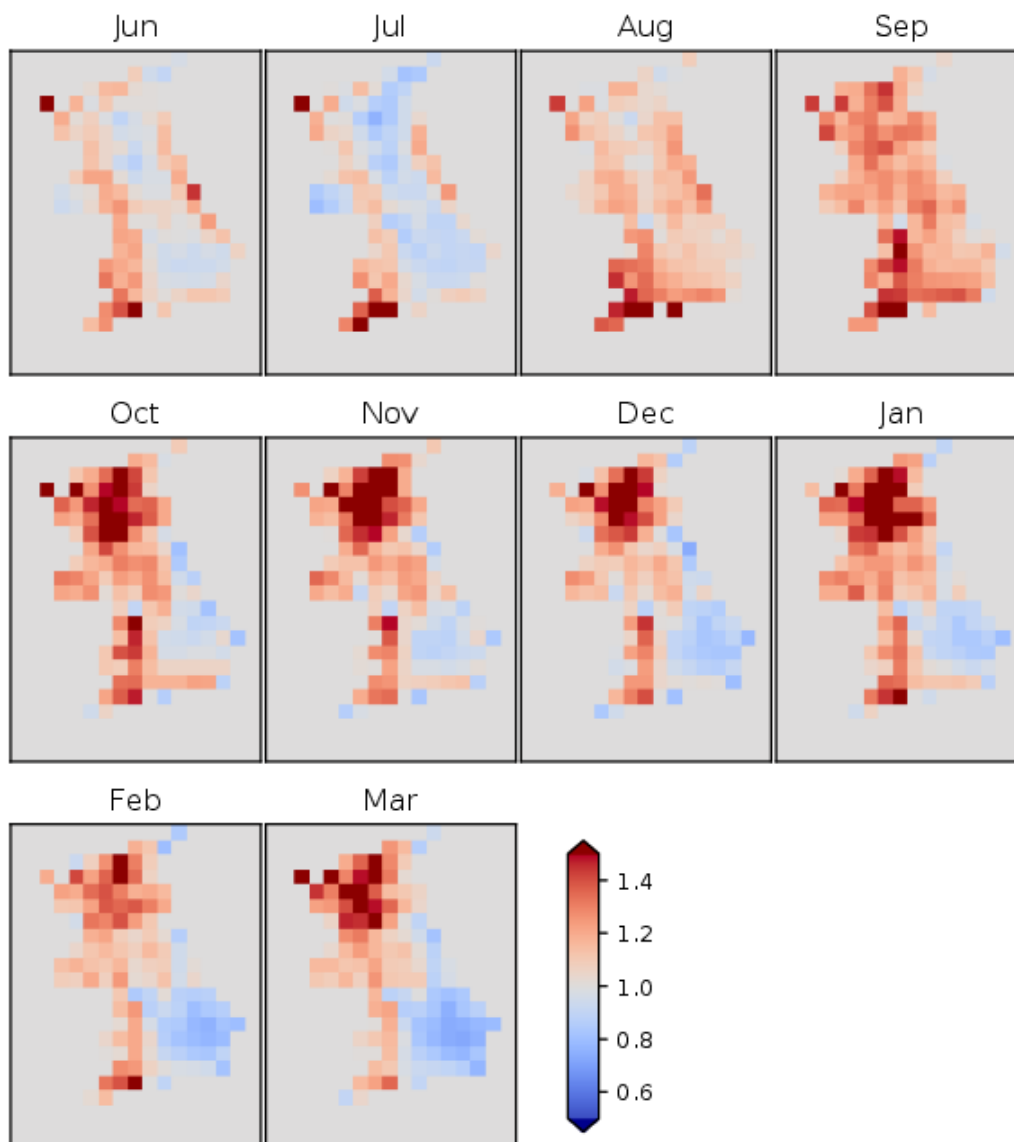

Figure S1 Correction grids for the May-initialised UNSEEN ensemble.

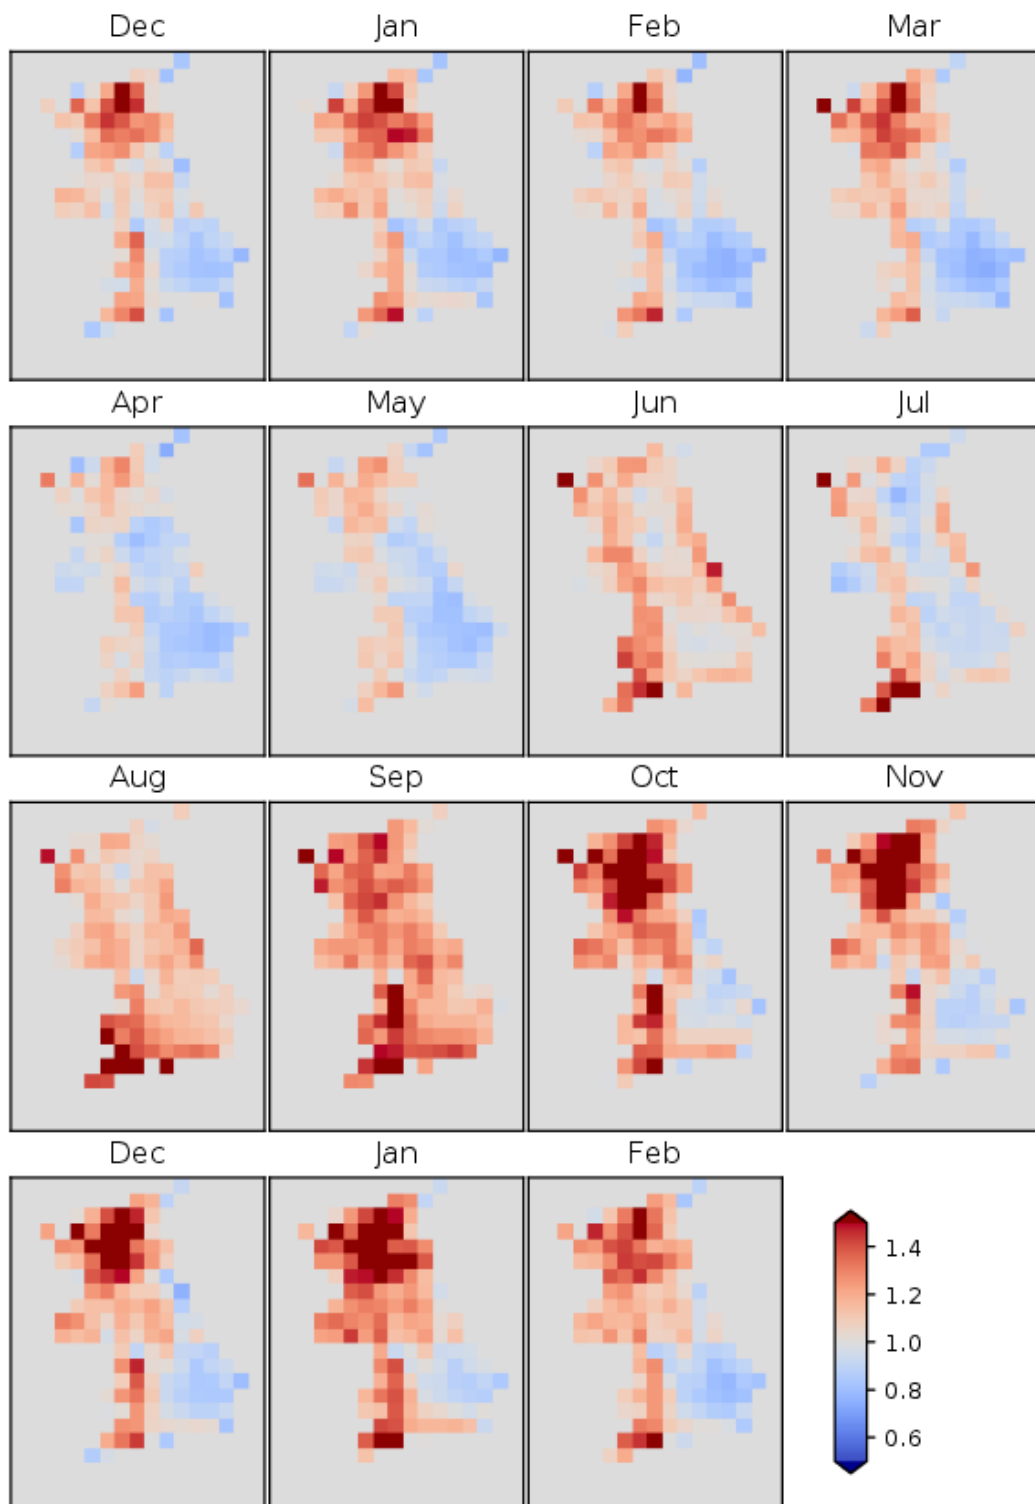

Figure S2 Correction grids for the Nov-initialised UNSEEN ensemble.
